# Supplementary material for: Reply to Comments by Yih et al. (Exposure to Hantavirus is a Risk Factor Associated with Kidney Diseases in Sri Lanka: A Cross-Sectional Study)
Source: MDPI journal article supplement (doi:10.3390/v11121150), 2019-12-11
Supplement: s1 [file s1]

```

LOGISTIC REGRESSION VARIABLES Renal_patient
/METHOD=ENTER Q2_Age
/METHOD=ENTER Male
/METHOD=ENTER Farming1_0
/METHOD=ENTER RatsAtHome1_0
/METHOD=ENTER DriedRodentFaeces1_0
/METHOD=ENTER Hanta_positive
/CONTRAST (Male)=Indicator(1)
/CONTRAST (Farming1_0)=Indicator(1)
/CONTRAST (RatsAtHome1_0)=Indicator(1)
/CONTRAST (DriedRodentFaeces1_0)=Indicator(1)
/CONTRAST (Hanta_positive)=Indicator(1)
/PRINT=GOODFIT CI(95)
/CRITERIA=PIN(0.05) POUT(0.10) ITERATE(20) CUT(0.5).

```

## Logistic Regression

[DataSet2] C:\Users\Chandika\Documents\yomani-MPhil thesis\Binary Logistics  
 \Kandy\Kandy\_All.sav

**Case Processing Summary**

| Unweighted Cases <sup>a</sup> |                      | N   | Percent |
|-------------------------------|----------------------|-----|---------|
| Selected Cases                | Included in Analysis | 320 | 100.0   |
|                               | Missing Cases        | 0   | .0      |
|                               | Total                | 320 | 100.0   |
| Unselected Cases              |                      | 0   | .0      |
| Total                         |                      | 320 | 100.0   |

a. If weight is in effect, see classification table for the total number of cases.

### Dependent Variable Encoding

| Original Value | Internal Value |
|----------------|----------------|
| 0              | 0              |
| 1              | 1              |

### Categorical Variables Codings

|                      |   | Frequency | Parameter coding |
|----------------------|---|-----------|------------------|
|                      |   |           | (1)              |
| Hanta_positive?      | 0 | 292       | .000             |
|                      | 1 | 28        | 1.000            |
| Farming1_0           | 0 | 251       | .000             |
|                      | 1 | 69        | 1.000            |
| RatsAtHome1_0        | 0 | 81        | .000             |
|                      | 1 | 239       | 1.000            |
| DriedRodentFaeces1_0 | 0 | 195       | .000             |
|                      | 1 | 125       | 1.000            |
| Male?                | 0 | 166       | .000             |
|                      | 1 | 154       | 1.000            |

### Block 0: Beginning Block

Classification Table<sup>a,b</sup>

| Observed              |   | Predicted      |   |                    |
|-----------------------|---|----------------|---|--------------------|
|                       |   | Renal_patient? |   | Percentage Correct |
|                       |   | 0              | 1 |                    |
| Step 0 Renal_patient? | 0 | 270            | 0 | 100.0              |
|                       | 1 | 50             | 0 | .0                 |
| Overall Percentage    |   |                |   | 84.4               |

a. Constant is included in the model.

b. The cut value is .500

### Variables in the Equation

|                 | B      | S.E. | Wald    | df | Sig. | Exp(B) |
|-----------------|--------|------|---------|----|------|--------|
| Step 0 Constant | -1.686 | .154 | 119.979 | 1  | .000 | .185   |

### Variables not in the Equation

|                         | Score  | df | Sig. |
|-------------------------|--------|----|------|
| Step 0 Variables Q2_Age | 10.610 | 1  | .001 |
| Overall Statistics      | 10.610 | 1  | .001 |

### Block 1: Method = Enter

### Omnibus Tests of Model Coefficients

|        |       | Chi-square | df | Sig. |
|--------|-------|------------|----|------|
| Step 1 | Step  | 10.585     | 1  | .001 |
|        | Block | 10.585     | 1  | .001 |
|        | Model | 10.585     | 1  | .001 |

### Model Summary

| Step | -2 Log likelihood    | Cox & Snell R Square | Nagelkerke R Square |
|------|----------------------|----------------------|---------------------|
| 1    | 266.791 <sup>a</sup> | .033                 | .056                |

a. Estimation terminated at iteration number 5 because parameter estimates changed by less than .001.

### Hosmer and Lemeshow Test

| Step | Chi-square | df | Sig. |
|------|------------|----|------|
| 1    | 10.029     | 8  | .263 |

### Contingency Table for Hosmer and Lemeshow Test

|        |    | Renal_patient? = 0 |          | Renal_patient? = 1 |          | Total |
|--------|----|--------------------|----------|--------------------|----------|-------|
|        |    | Observed           | Expected | Observed           | Expected |       |
| Step 1 | 1  | 34                 | 31.619   | 0                  | 2.381    | 34    |
|        | 2  | 32                 | 30.838   | 2                  | 3.162    | 34    |
|        | 3  | 31                 | 32.989   | 6                  | 4.011    | 37    |
|        | 4  | 22                 | 24.575   | 6                  | 3.425    | 28    |
|        | 5  | 24                 | 25.054   | 5                  | 3.946    | 29    |
|        | 6  | 27                 | 26.385   | 4                  | 4.615    | 31    |
|        | 7  | 27                 | 27.396   | 6                  | 5.604    | 33    |
|        | 8  | 28                 | 25.664   | 4                  | 6.336    | 32    |
|        | 9  | 21                 | 23.750   | 10                 | 7.250    | 31    |
|        | 10 | 24                 | 21.729   | 7                  | 9.271    | 31    |

### Classification Table<sup>a</sup>

|                    |                  | Predicted      |   |                    |
|--------------------|------------------|----------------|---|--------------------|
|                    |                  | Renal_patient? |   | Percentage Correct |
| Observed           |                  | 0              | 1 |                    |
| Step 1             | Renal_patient? 0 | 270            | 0 | 100.0              |
|                    | 1                | 50             | 0 | .0                 |
| Overall Percentage |                  |                |   | 84.4               |

a. The cut value is .500

**Variables in the Equation**

|                     |          | B      | S.E. | Wald   | df | Sig. | Exp(B) | 95% C.I. |
|---------------------|----------|--------|------|--------|----|------|--------|----------|
|                     |          |        |      |        |    |      |        | Lower    |
| Step 1 <sup>a</sup> | Q2_Age   | .036   | .011 | 10.194 | 1  | .001 | 1.037  | 1.014    |
|                     | Constant | -3.520 | .620 | 32.218 | 1  | .000 | .030   |          |

**Variables in the Equation**

|                     |          | 95% C.I.... |
|---------------------|----------|-------------|
|                     |          | Upper       |
| Step 1 <sup>a</sup> | Q2_Age   | 1.061       |
|                     | Constant |             |

a. Variable(s) entered on step 1: Q2\_Age.

## Block 2: Method = Enter

**Omnibus Tests of Model Coefficients**

|        |       | Chi-square | df | Sig. |
|--------|-------|------------|----|------|
| Step 1 | Step  | 1.066      | 1  | .302 |
|        | Block | 1.066      | 1  | .302 |
|        | Model | 11.651     | 2  | .003 |

**Model Summary**

| Step | -2 Log likelihood    | Cox & Snell R Square | Nagelkerke R Square |
|------|----------------------|----------------------|---------------------|
| 1    | 265.724 <sup>a</sup> | .036                 | .062                |

a. Estimation terminated at iteration number 5 because parameter estimates changed by less than .001.

**Hosmer and Lemeshow Test**

| Step | Chi-square | df | Sig. |
|------|------------|----|------|
| 1    | 10.720     | 8  | .218 |

**Contingency Table for Hosmer and Lemeshow Test**

|        |    | Renal_patient? = 0 |          | Renal_patient? = 1 |          | Total |
|--------|----|--------------------|----------|--------------------|----------|-------|
|        |    | Observed           | Expected | Observed           | Expected |       |
| Step 1 | 1  | 33                 | 30.777   | 0                  | 2.223    | 33    |
|        | 2  | 29                 | 27.369   | 1                  | 2.631    | 30    |
|        | 3  | 29                 | 29.574   | 4                  | 3.426    | 33    |
|        | 4  | 28                 | 30.789   | 7                  | 4.211    | 35    |
|        | 5  | 26                 | 27.777   | 6                  | 4.223    | 32    |
|        | 6  | 24                 | 26.356   | 7                  | 4.644    | 31    |
|        | 7  | 30                 | 27.403   | 3                  | 5.597    | 33    |
|        | 8  | 23                 | 24.009   | 7                  | 5.991    | 30    |
|        | 9  | 27                 | 24.533   | 5                  | 7.467    | 32    |
|        | 10 | 21                 | 21.413   | 10                 | 9.587    | 31    |

**Classification Table<sup>a</sup>**

| Observed |                    |   | Predicted      |   |                    |
|----------|--------------------|---|----------------|---|--------------------|
|          |                    |   | Renal_patient? |   | Percentage Correct |
|          |                    |   | 0              | 1 |                    |
| Step 1   | Renal_patient?     | 0 | 270            | 0 | 100.0              |
|          |                    | 1 | 50             | 0 | .0                 |
|          | Overall Percentage |   |                |   | 84.4               |

a. The cut value is .500

**Variables in the Equation**

|                     |          | B      | S.E. | Wald   | df | Sig. | Exp(B) | 95% C.I. Lower |
|---------------------|----------|--------|------|--------|----|------|--------|----------------|
| Step 1 <sup>a</sup> | Q2_Age   | .036   | .011 | 9.800  | 1  | .002 | 1.036  | 1.013          |
|                     | Male(1)  | .325   | .315 | 1.061  | 1  | .303 | 1.384  | .746           |
|                     | Constant | -3.651 | .635 | 33.011 | 1  | .000 | .026   |                |

**Variables in the Equation**

|                     |          | 95% C.I. Upper |
|---------------------|----------|----------------|
| Step 1 <sup>a</sup> | Q2_Age   | 1.060          |
|                     | Male(1)  | 2.568          |
|                     | Constant |                |

a. Variable(s) entered on step 1: Male.

**Block 3: Method = Enter**

### Omnibus Tests of Model Coefficients

|        |       | Chi-square | df | Sig. |
|--------|-------|------------|----|------|
| Step 1 | Step  | .008       | 1  | .929 |
|        | Block | .008       | 1  | .929 |
|        | Model | 11.659     | 3  | .009 |

### Model Summary

| Step | -2 Log likelihood    | Cox & Snell R Square | Nagelkerke R Square |
|------|----------------------|----------------------|---------------------|
| 1    | 265.716 <sup>a</sup> | .036                 | .062                |

a. Estimation terminated at iteration number 5 because parameter estimates changed by less than .001.

### Hosmer and Lemeshow Test

| Step | Chi-square | df | Sig. |
|------|------------|----|------|
| 1    | 8.994      | 8  | .343 |

### Contingency Table for Hosmer and Lemeshow Test

|        |    | Renal_patient? = 0 |          | Renal_patient? = 1 |          | Total |
|--------|----|--------------------|----------|--------------------|----------|-------|
|        |    | Observed           | Expected | Observed           | Expected |       |
| Step 1 | 1  | 32                 | 29.859   | 0                  | 2.141    | 32    |
|        | 2  | 31                 | 29.192   | 1                  | 2.808    | 32    |
|        | 3  | 28                 | 28.671   | 4                  | 3.329    | 32    |
|        | 4  | 28                 | 30.794   | 7                  | 4.206    | 35    |
|        | 5  | 26                 | 27.772   | 6                  | 4.228    | 32    |
|        | 6  | 25                 | 27.206   | 7                  | 4.794    | 32    |
|        | 7  | 29                 | 27.390   | 4                  | 5.610    | 33    |
|        | 8  | 28                 | 27.082   | 6                  | 6.918    | 34    |
|        | 9  | 25                 | 23.565   | 6                  | 7.435    | 31    |
|        | 10 | 18                 | 18.468   | 9                  | 8.532    | 27    |

### Classification Table<sup>a</sup>

|                    |                  | Predicted      |   |                    |
|--------------------|------------------|----------------|---|--------------------|
|                    |                  | Renal_patient? |   | Percentage Correct |
| Observed           |                  | 0              | 1 |                    |
| Step 1             | Renal_patient? 0 | 270            | 0 | 100.0              |
|                    | 1                | 50             | 0 | .0                 |
| Overall Percentage |                  |                |   | 84.4               |

a. The cut value is .500

**Variables in the Equation**

|                     |               | B      | S.E. | Wald   | df | Sig. | Exp(B) |
|---------------------|---------------|--------|------|--------|----|------|--------|
| Step 1 <sup>a</sup> | Q2_Age        | .036   | .012 | 9.457  | 1  | .002 | 1.037  |
|                     | Male(1)       | .330   | .321 | 1.059  | 1  | .303 | 1.391  |
|                     | Farming1_0(1) | -.034  | .379 | .008   | 1  | .929 | .967   |
|                     | Constant      | -3.657 | .640 | 32.702 | 1  | .000 | .026   |

**Variables in the Equation**

|                     |               | 95% C.I. for EXP(B) |       |
|---------------------|---------------|---------------------|-------|
|                     |               | Lower               | Upper |
| Step 1 <sup>a</sup> | Q2_Age        | 1.013               | 1.061 |
|                     | Male(1)       | .742                | 2.609 |
|                     | Farming1_0(1) | .460                | 2.032 |
|                     | Constant      |                     |       |

a. Variable(s) entered on step 1: Farming1\_0.

## Block 4: Method = Enter

**Omnibus Tests of Model Coefficients**

|        |       | Chi-square | df | Sig. |
|--------|-------|------------|----|------|
| Step 1 | Step  | 2.600      | 1  | .107 |
|        | Block | 2.600      | 1  | .107 |
|        | Model | 14.259     | 4  | .007 |

**Model Summary**

| Step | -2 Log likelihood    | Cox & Snell R Square | Nagelkerke R Square |
|------|----------------------|----------------------|---------------------|
| 1    | 263.116 <sup>a</sup> | .044                 | .075                |

a. Estimation terminated at iteration number 5 because parameter estimates changed by less than .001.

**Hosmer and Lemeshow Test**

| Step | Chi-square | df | Sig. |
|------|------------|----|------|
| 1    | 8.862      | 8  | .354 |

**Contingency Table for Hosmer and Lemeshow Test**

|        |    | Renal_patient? = 0 |          | Renal_patient? = 1 |          | Total |
|--------|----|--------------------|----------|--------------------|----------|-------|
|        |    | Observed           | Expected | Observed           | Expected |       |
| Step 1 | 1  | 32                 | 30.009   | 0                  | 1.991    | 32    |
|        | 2  | 31                 | 29.313   | 1                  | 2.687    | 32    |
|        | 3  | 29                 | 28.811   | 3                  | 3.189    | 32    |
|        | 4  | 28                 | 28.380   | 4                  | 3.620    | 32    |
|        | 5  | 25                 | 27.922   | 7                  | 4.078    | 32    |
|        | 6  | 26                 | 27.339   | 6                  | 4.661    | 32    |
|        | 7  | 25                 | 27.342   | 8                  | 5.658    | 33    |
|        | 8  | 27                 | 26.437   | 6                  | 6.563    | 33    |
|        | 9  | 24                 | 24.507   | 8                  | 7.493    | 32    |
|        | 10 | 23                 | 19.939   | 7                  | 10.061   | 30    |

**Classification Table<sup>a</sup>**

| Observed |                    |   | Predicted      |   |                    |
|----------|--------------------|---|----------------|---|--------------------|
|          |                    |   | Renal_patient? |   | Percentage Correct |
|          |                    |   | 0              | 1 |                    |
| Step 1   | Renal_patient?     | 0 | 270            | 0 | 100.0              |
|          |                    | 1 | 50             | 0 | .0                 |
|          | Overall Percentage |   |                |   | 84.4               |

a. The cut value is .500

**Variables in the Equation**

|                     | B      | S.E. | Wald   | df | Sig. | Exp(B) |
|---------------------|--------|------|--------|----|------|--------|
| Step 1 <sup>a</sup> |        |      |        |    |      |        |
| Q2_Age              | .035   | .012 | 9.077  | 1  | .003 | 1.036  |
| Male(1)             | .386   | .326 | 1.407  | 1  | .236 | 1.471  |
| Farming1_0(1)       | .016   | .385 | .002   | 1  | .968 | 1.016  |
| RatsAtHome1_0(1)    | -.565  | .344 | 2.693  | 1  | .101 | .568   |
| Constant            | -3.255 | .674 | 23.319 | 1  | .000 | .039   |

**Variables in the Equation**

|                     |  | 95% C.I. for EXP(B) |       |
|---------------------|--|---------------------|-------|
|                     |  | Lower               | Upper |
| Step 1 <sup>a</sup> |  |                     |       |
| Q2_Age              |  | 1.012               | 1.060 |
| Male(1)             |  | .777                | 2.785 |
| Farming1_0(1)       |  | .477                | 2.162 |
| RatsAtHome1_0(1)    |  | .289                | 1.116 |
| Constant            |  |                     |       |

a. Variable(s) entered on step 1: RatsAtHome1\_0.



## Block 5: Method = Enter

**Omnibus Tests of Model Coefficients**

|        |       | Chi-square | df | Sig. |
|--------|-------|------------|----|------|
| Step 1 | Step  | .000       | 1  | .986 |
|        | Block | .000       | 1  | .986 |
|        | Model | 14.260     | 5  | .014 |

**Model Summary**

| Step | -2 Log likelihood    | Cox & Snell R Square | Nagelkerke R Square |
|------|----------------------|----------------------|---------------------|
| 1    | 263.116 <sup>a</sup> | .044                 | .075                |

a. Estimation terminated at iteration number 5 because parameter estimates changed by less than .001.

**Hosmer and Lemeshow Test**

| Step | Chi-square | df | Sig. |
|------|------------|----|------|
| 1    | 9.875      | 8  | .274 |

**Contingency Table for Hosmer and Lemeshow Test**

|        |    | Renal_patient? = 0 |          | Renal_patient? = 1 |          | Total |
|--------|----|--------------------|----------|--------------------|----------|-------|
|        |    | Observed           | Expected | Observed           | Expected |       |
| Step 1 | 1  | 32                 | 30.010   | 0                  | 1.990    | 32    |
|        | 2  | 31                 | 29.313   | 1                  | 2.687    | 32    |
|        | 3  | 29                 | 28.811   | 3                  | 3.189    | 32    |
|        | 4  | 28                 | 28.380   | 4                  | 3.620    | 32    |
|        | 5  | 25                 | 28.784   | 8                  | 4.216    | 33    |
|        | 6  | 27                 | 27.317   | 5                  | 4.683    | 32    |
|        | 7  | 25                 | 27.317   | 8                  | 5.683    | 33    |
|        | 8  | 26                 | 25.622   | 6                  | 6.378    | 32    |
|        | 9  | 24                 | 24.512   | 8                  | 7.488    | 32    |
|        | 10 | 23                 | 19.935   | 7                  | 10.065   | 30    |

**Classification Table<sup>a</sup>**

|                    |                  | Predicted      |   |                    |
|--------------------|------------------|----------------|---|--------------------|
|                    |                  | Renal_patient? |   | Percentage Correct |
| Observed           |                  | 0              | 1 |                    |
| Step 1             | Renal_patient? 0 | 270            | 0 | 100.0              |
|                    | 1                | 50             | 0 | .0                 |
| Overall Percentage |                  |                |   | 84.4               |

a. The cut value is .500

#### Variables in the Equation

|                         | B      | S.E. | Wald   | df | Sig. | Exp(B) |
|-------------------------|--------|------|--------|----|------|--------|
| Step 1 <sup>a</sup>     |        |      |        |    |      |        |
| Q2_Age                  | .035   | .012 | 9.005  | 1  | .003 | 1.036  |
| Male(1)                 | .387   | .326 | 1.403  | 1  | .236 | 1.472  |
| Farming1_0(1)           | .015   | .388 | .001   | 1  | .970 | 1.015  |
| RatsAtHome1_0(1)        | -.568  | .376 | 2.275  | 1  | .131 | .567   |
| DriedRodentFaeces1_0(1) | .007   | .366 | .000   | 1  | .986 | 1.007  |
| Constant                | -3.257 | .679 | 22.983 | 1  | .000 | .039   |

#### Variables in the Equation

|                         | 95% C.I. for EXP(B) |       |
|-------------------------|---------------------|-------|
|                         | Lower               | Upper |
| Step 1 <sup>a</sup>     |                     |       |
| Q2_Age                  | 1.012               | 1.060 |
| Male(1)                 | .776                | 2.790 |
| Farming1_0(1)           | .474                | 2.173 |
| RatsAtHome1_0(1)        | .271                | 1.185 |
| DriedRodentFaeces1_0(1) | .492                | 2.061 |
| Constant                |                     |       |

a. Variable(s) entered on step 1: DriedRodentFaeces1\_0.

## Block 6: Method = Enter

#### Omnibus Tests of Model Coefficients

|             | Chi-square | df | Sig. |
|-------------|------------|----|------|
| Step 1 Step | 3.170      | 1  | .075 |
| Block       | 3.170      | 1  | .075 |
| Model       | 17.429     | 6  | .008 |

#### Model Summary

| Step | -2 Log likelihood    | Cox & Snell R Square | Nagelkerke R Square |
|------|----------------------|----------------------|---------------------|
| 1    | 259.946 <sup>a</sup> | .053                 | .091                |

a. Estimation terminated at iteration number 5 because parameter estimates changed by less than .001.

#### Hosmer and Lemeshow Test

| Step | Chi-square | df | Sig. |
|------|------------|----|------|
| 1    | 5.733      | 8  | .677 |

**Contingency Table for Hosmer and Lemeshow Test**

|        |    | Renal_patient? = 0 |          | Renal_patient? = 1 |          | Total |
|--------|----|--------------------|----------|--------------------|----------|-------|
|        |    | Observed           | Expected | Observed           | Expected |       |
| Step 1 | 1  | 32                 | 30.032   | 0                  | 1.968    | 32    |
|        | 2  | 32                 | 30.283   | 1                  | 2.717    | 33    |
|        | 3  | 30                 | 29.816   | 3                  | 3.184    | 33    |
|        | 4  | 27                 | 28.510   | 5                  | 3.490    | 32    |
|        | 5  | 27                 | 28.032   | 5                  | 3.968    | 32    |
|        | 6  | 26                 | 27.452   | 6                  | 4.548    | 32    |
|        | 7  | 28                 | 27.448   | 5                  | 5.552    | 33    |
|        | 8  | 24                 | 25.785   | 8                  | 6.215    | 32    |
|        | 9  | 25                 | 24.566   | 7                  | 7.434    | 32    |
|        | 10 | 19                 | 18.076   | 10                 | 10.924   | 29    |

**Classification Table<sup>a</sup>**

| Observed |                    |   | Predicted      |   |                    |
|----------|--------------------|---|----------------|---|--------------------|
|          |                    |   | Renal_patient? |   | Percentage Correct |
|          |                    |   | 0              | 1 |                    |
| Step 1   | Renal_patient?     | 0 | 268            | 2 | 99.3               |
|          |                    | 1 | 49             | 1 | 2.0                |
|          | Overall Percentage |   |                |   | 84.1               |

a. The cut value is .500

**Variables in the Equation**

|                         | B      | S.E. | Wald   | df | Sig. | Exp(B) |
|-------------------------|--------|------|--------|----|------|--------|
| Step 1 <sup>a</sup>     |        |      |        |    |      |        |
| Q2_Age                  | .034   | .012 | 8.077  | 1  | .004 | 1.034  |
| Male(1)                 | .341   | .329 | 1.078  | 1  | .299 | 1.407  |
| Farming1_0(1)           | -.100  | .400 | .062   | 1  | .803 | .905   |
| RatsAtHome1_0(1)        | -.538  | .381 | 2.001  | 1  | .157 | .584   |
| DriedRodentFaeces1_0(1) | .004   | .368 | .000   | 1  | .992 | 1.004  |
| Hanta_positive(1)       | .868   | .469 | 3.427  | 1  | .064 | 2.381  |
| Constant                | -3.241 | .679 | 22.803 | 1  | .000 | .039   |

**Variables in the Equation**

|                     |                         | 95% C.I. for EXP(B) |       |
|---------------------|-------------------------|---------------------|-------|
|                     |                         | Lower               | Upper |
| Step 1 <sup>a</sup> | Q2_Age                  | 1.010               | 1.058 |
|                     | Male(1)                 | .738                | 2.681 |
|                     | Farming1_0(1)           | .413                | 1.982 |
|                     | RatsAtHome1_0(1)        | .277                | 1.231 |
|                     | DriedRodentFaeces1_0(1) | .488                | 2.064 |
|                     | Hanta_positive(1)       | .950                | 5.968 |
|                     | Constant                |                     |       |

a. Variable(s) entered on step 1: Hanta\_positive.
