# Supplementary material for: Reply to Comments by Yih et al. (Exposure to Hantavirus is a Risk Factor Associated with Kidney Diseases in Sri Lanka: A Cross-Sectional Study)
Source: MDPI journal article supplement (doi:10.3390/v11121150), 2019-12-11
Supplement: s1 [file s1]

```

LOGISTIC REGRESSION VARIABLES Renal_patient
/METHOD=ENTER Q2_Age
/METHOD=ENTER Q3_Gender
/METHOD=ENTER Farming
/METHOD=ENTER RatsInHouse
/METHOD=ENTER DriedRodentFaeces2
/METHOD=ENTER Hanta_positive
/CONTRAST (Q3_Gender)=Indicator(1)
/CONTRAST (Farming)=Indicator(1)
/CONTRAST (RatsInHouse)=Indicator(1)
/CONTRAST (DriedRodentFaeces2)=Indicator(1)
/PRINT=GOODFIT CI(95)
/CRITERIA=PIN(0.05) POUT(0.10) ITERATE(20) CUT(0.5).

```

## Logistic Regression

[DataSet1] C:\Users\Chandika\Documents\yomani-MPhil thesis\Binary Logistic  
s\GK-all-cases.sav

**Case Processing Summary**

| Unweighted Cases <sup>a</sup> |                      | N   | Percent |
|-------------------------------|----------------------|-----|---------|
| Selected Cases                | Included in Analysis | 346 | 100.0   |
|                               | Missing Cases        | 0   | .0      |
|                               | Total                | 346 | 100.0   |
| Unselected Cases              |                      | 0   | .0      |
| Total                         |                      | 346 | 100.0   |

a. If weight is in effect, see classification table for the total number of cases.

**Dependent Variable Encoding**

| Original Value | Internal Value |
|----------------|----------------|
| 0              | 0              |
| 1              | 1              |

### Categorical Variables Codings

|                    |   | Frequency | Parameter coding |
|--------------------|---|-----------|------------------|
|                    |   |           | (1)              |
| DriedRodentFaeces2 | 0 | 137       | .000             |
|                    | 1 | 209       | 1.000            |
| Farming            | 0 | 69        | .000             |
|                    | 1 | 277       | 1.000            |
| RatsInHouse        | 0 | 65        | .000             |
|                    | 1 | 281       | 1.000            |
| Male?              | 0 | 178       | .000             |
|                    | 1 | 168       | 1.000            |

## Block 0: Beginning Block

Classification Table<sup>a,b</sup>

| Observed |                    |   | Predicted      |   |                    |
|----------|--------------------|---|----------------|---|--------------------|
|          |                    |   | Renal_patient? |   | Percentage Correct |
|          |                    |   | 0              | 1 |                    |
| Step 0   | Renal_patient?     | 0 | 242            | 0 | 100.0              |
|          |                    | 1 | 104            | 0 | .0                 |
|          | Overall Percentage |   |                |   | 69.9               |

a. Constant is included in the model.

b. The cut value is .500

### Variables in the Equation

|                 | B     | S.E. | Wald   | df | Sig. | Exp(B) |
|-----------------|-------|------|--------|----|------|--------|
| Step 0 Constant | -.845 | .117 | 51.882 | 1  | .000 | .430   |

### Variables not in the Equation

|                         | Score  | df | Sig. |
|-------------------------|--------|----|------|
| Step 0 Variables Q2_Age | 56.314 | 1  | .000 |
| Overall Statistics      | 56.314 | 1  | .000 |

## Block 1: Method = Enter

### Omnibus Tests of Model Coefficients

|             | Chi-square | df | Sig. |
|-------------|------------|----|------|
| Step 1 Step | 60.633     | 1  | .000 |
| Block       | 60.633     | 1  | .000 |
| Model       | 60.633     | 1  | .000 |

### Model Summary

| Step | -2 Log likelihood    | Cox & Snell R Square | Nagelkerke R Square |
|------|----------------------|----------------------|---------------------|
| 1    | 362.424 <sup>a</sup> | .161                 | .228                |

a. Estimation terminated at iteration number 5 because parameter estimates changed by less than .001.

### Hosmer and Lemeshow Test

| Step | Chi-square | df | Sig. |
|------|------------|----|------|
| 1    | 10.651     | 8  | .222 |

### Contingency Table for Hosmer and Lemeshow Test

|        |    | Renal_patient? = 0 |          | Renal_patient? = 1 |          | Total |
|--------|----|--------------------|----------|--------------------|----------|-------|
|        |    | Observed           | Expected | Observed           | Expected |       |
| Step 1 | 1  | 35                 | 32.908   | 0                  | 2.092    | 35    |
|        | 2  | 33                 | 32.923   | 4                  | 4.077    | 37    |
|        | 3  | 32                 | 31.761   | 5                  | 5.239    | 37    |
|        | 4  | 32                 | 30.525   | 6                  | 7.475    | 38    |
|        | 5  | 24                 | 26.981   | 12                 | 9.019    | 36    |
|        | 6  | 23                 | 20.591   | 7                  | 9.409    | 30    |
|        | 7  | 18                 | 21.441   | 16                 | 12.559   | 34    |
|        | 8  | 16                 | 17.450   | 15                 | 13.550   | 31    |
|        | 9  | 15                 | 17.951   | 22                 | 19.049   | 37    |
|        | 10 | 14                 | 9.468    | 17                 | 21.532   | 31    |

### Classification Table<sup>a</sup>

| Observed |                    |   | Predicted      |    |                    |
|----------|--------------------|---|----------------|----|--------------------|
|          |                    |   | Renal_patient? |    | Percentage Correct |
|          |                    |   | 0              | 1  |                    |
| Step 1   | Renal_patient?     | 0 | 222            | 20 | 91.7               |
|          |                    | 1 | 75             | 29 | 27.9               |
|          | Overall Percentage |   |                |    | 72.5               |

a. The cut value is .500

### Variables in the Equation

|                     |          | B      | S.E. | Wald   | df | Sig. | Exp(B) | 95% C.I. Lower |
|---------------------|----------|--------|------|--------|----|------|--------|----------------|
| Step 1 <sup>a</sup> | Q2_Age   | .070   | .010 | 46.995 | 1  | .000 | 1.072  | 1.051          |
|                     | Constant | -4.481 | .566 | 62.679 | 1  | .000 | .011   |                |

### Variables in the Equation

|                     |          | 95% C.I.... |
|---------------------|----------|-------------|
|                     |          | Upper       |
| Step 1 <sup>a</sup> | Q2_Age   | 1.094       |
|                     | Constant |             |

a. Variable(s) entered on step 1: Q2\_Age.

## Block 2: Method = Enter

### Omnibus Tests of Model Coefficients

|        |       | Chi-square | df | Sig. |
|--------|-------|------------|----|------|
| Step 1 | Step  | 16.242     | 1  | .000 |
|        | Block | 16.242     | 1  | .000 |
|        | Model | 76.875     | 2  | .000 |

### Model Summary

| Step | -2 Log likelihood    | Cox & Snell R Square | Nagelkerke R Square |
|------|----------------------|----------------------|---------------------|
| 1    | 346.182 <sup>a</sup> | .199                 | .282                |

a. Estimation terminated at iteration number 5 because parameter estimates changed by less than .001.

### Hosmer and Lemeshow Test

| Step | Chi-square | df | Sig. |
|------|------------|----|------|
| 1    | 16.315     | 8  | .038 |

### Contingency Table for Hosmer and Lemeshow Test

|        |    | Renal_patient? = 0 |          | Renal_patient? = 1 |          | Total |
|--------|----|--------------------|----------|--------------------|----------|-------|
|        |    | Observed           | Expected | Observed           | Expected |       |
| Step 1 | 1  | 35                 | 33.492   | 0                  | 1.508    | 35    |
|        | 2  | 33                 | 33.221   | 3                  | 2.779    | 36    |
|        | 3  | 31                 | 30.402   | 4                  | 4.598    | 35    |
|        | 4  | 30                 | 27.623   | 4                  | 6.377    | 34    |
|        | 5  | 29                 | 27.494   | 7                  | 8.506    | 36    |
|        | 6  | 23                 | 25.283   | 13                 | 10.717   | 36    |
|        | 7  | 21                 | 23.350   | 15                 | 12.650   | 36    |
|        | 8  | 18                 | 20.181   | 18                 | 15.819   | 36    |
|        | 9  | 10                 | 15.098   | 26                 | 20.902   | 36    |
|        | 10 | 12                 | 5.855    | 14                 | 20.145   | 26    |

**Classification Table<sup>a</sup>**

| Observed           |                |   | Predicted      |    |                    |
|--------------------|----------------|---|----------------|----|--------------------|
|                    |                |   | Renal_patient? |    | Percentage Correct |
|                    |                |   | 0              | 1  |                    |
| Step 1             | Renal_patient? | 0 | 220            | 22 | 90.9               |
|                    |                | 1 | 64             | 40 | 38.5               |
| Overall Percentage |                |   |                |    | 75.1               |

a. The cut value is .500

**Variables in the Equation**

|                     |              | B      | S.E. | Wald   | df | Sig. | Exp(B) | 95% C.I. of B |
|---------------------|--------------|--------|------|--------|----|------|--------|---------------|
|                     |              |        |      |        |    |      |        | Lower         |
| Step 1 <sup>a</sup> | Q2_Age       | .070   | .011 | 43.091 | 1  | .000 | 1.073  | 1.050         |
|                     | Q3_Gender(1) | 1.059  | .269 | 15.519 | 1  | .000 | 2.884  | 1.703         |
|                     | Constant     | -5.058 | .622 | 66.219 | 1  | .000 | .006   |               |

**Variables in the Equation**

|                     |              | 95% C.I. of B |
|---------------------|--------------|---------------|
|                     |              | Upper         |
| Step 1 <sup>a</sup> | Q2_Age       | 1.095         |
|                     | Q3_Gender(1) | 4.884         |
|                     | Constant     |               |

a. Variable(s) entered on step 1: Q3\_Gender.

### Block 3: Method = Enter

**Omnibus Tests of Model Coefficients**

|        |       | Chi-square | df | Sig. |
|--------|-------|------------|----|------|
| Step 1 | Step  | 6.437      | 1  | .011 |
|        | Block | 6.437      | 1  | .011 |
|        | Model | 83.312     | 3  | .000 |

**Model Summary**

| Step | -2 Log likelihood    | Cox & Snell R Square | Nagelkerke R Square |
|------|----------------------|----------------------|---------------------|
| 1    | 339.744 <sup>a</sup> | .214                 | .303                |

a. Estimation terminated at iteration number 5 because parameter estimates changed by less than .001.

### Hosmer and Lemeshow Test

| Step | Chi-square | df | Sig. |
|------|------------|----|------|
| 1    | 13.255     | 8  | .103 |

### Contingency Table for Hosmer and Lemeshow Test

|        |    | Renal_patient? = 0 |          | Renal_patient? = 1 |          | Total |
|--------|----|--------------------|----------|--------------------|----------|-------|
|        |    | Observed           | Expected | Observed           | Expected |       |
| Step 1 | 1  | 34                 | 34.098   | 1                  | .902     | 35    |
|        | 2  | 33                 | 32.478   | 2                  | 2.522    | 35    |
|        | 3  | 33                 | 31.118   | 2                  | 3.882    | 35    |
|        | 4  | 29                 | 28.779   | 6                  | 6.221    | 35    |
|        | 5  | 30                 | 26.618   | 5                  | 8.382    | 35    |
|        | 6  | 23                 | 24.990   | 13                 | 11.010   | 36    |
|        | 7  | 22                 | 23.280   | 15                 | 13.720   | 37    |
|        | 8  | 17                 | 19.330   | 18                 | 15.670   | 35    |
|        | 9  | 10                 | 15.411   | 27                 | 21.589   | 37    |
|        | 10 | 11                 | 5.899    | 15                 | 20.101   | 26    |

### Classification Table<sup>a</sup>

| Observed           |                  | Predicted      |    |                    |
|--------------------|------------------|----------------|----|--------------------|
|                    |                  | Renal_patient? |    | Percentage Correct |
|                    |                  | 0              | 1  |                    |
| Step 1             | Renal_patient? 0 | 218            | 24 | 90.1               |
|                    | 1                | 62             | 42 | 40.4               |
| Overall Percentage |                  |                |    | 75.1               |

a. The cut value is .500

### Variables in the Equation

|                     |              | B      | S.E. | Wald   | df | Sig. | Exp(B) | 95% C.I. Lower |
|---------------------|--------------|--------|------|--------|----|------|--------|----------------|
| Step 1 <sup>a</sup> | Q2_Age       | .067   | .011 | 37.591 | 1  | .000 | 1.069  | 1.046          |
|                     | Q3_Gender(1) | .957   | .273 | 12.294 | 1  | .000 | 2.603  | 1.525          |
|                     | Farming(1)   | 1.113  | .478 | 5.410  | 1  | .020 | 3.043  | 1.191          |
|                     | Constant     | -5.796 | .741 | 61.160 | 1  | .000 | .003   |                |

### Variables in the Equation

|                     |              | 95% C.I. Upper |
|---------------------|--------------|----------------|
| Step 1 <sup>a</sup> | Q2_Age       | 1.092          |
|                     | Q3_Gender(1) | 4.445          |
|                     | Farming(1)   | 7.773          |
|                     | Constant     |                |

a. Variable(s) entered on step 1: Farming.

## Block 4: Method = Enter

### Omnibus Tests of Model Coefficients

|        |       | Chi-square | df | Sig. |
|--------|-------|------------|----|------|
| Step 1 | Step  | .463       | 1  | .496 |
|        | Block | .463       | 1  | .496 |
|        | Model | 83.775     | 4  | .000 |

### Model Summary

| Step | -2 Log likelihood    | Cox & Snell R Square | Nagelkerke R Square |
|------|----------------------|----------------------|---------------------|
| 1    | 339.282 <sup>a</sup> | .215                 | .305                |

a. Estimation terminated at iteration number 5 because parameter estimates changed by less than .001.

### Hosmer and Lemeshow Test

| Step | Chi-square | df | Sig. |
|------|------------|----|------|
| 1    | 9.106      | 8  | .333 |

### Contingency Table for Hosmer and Lemeshow Test

|        |    | Renal_patient? = 0 |          | Renal_patient? = 1 |          | Total |
|--------|----|--------------------|----------|--------------------|----------|-------|
|        |    | Observed           | Expected | Observed           | Expected |       |
| Step 1 | 1  | 34                 | 34.120   | 1                  | .880     | 35    |
|        | 2  | 33                 | 32.494   | 2                  | 2.506    | 35    |
|        | 3  | 33                 | 31.086   | 2                  | 3.914    | 35    |
|        | 4  | 29                 | 28.776   | 6                  | 6.224    | 35    |
|        | 5  | 30                 | 25.975   | 4                  | 8.025    | 34    |
|        | 6  | 22                 | 23.677   | 12                 | 10.323   | 34    |
|        | 7  | 20                 | 23.466   | 17                 | 13.534   | 37    |
|        | 8  | 17                 | 19.744   | 18                 | 15.256   | 35    |
|        | 9  | 13                 | 15.113   | 22                 | 19.887   | 35    |
|        | 10 | 11                 | 7.549    | 20                 | 23.451   | 31    |

**Classification Table<sup>a</sup>**

| Observed |                    |   | Predicted      |    |                    |
|----------|--------------------|---|----------------|----|--------------------|
|          |                    |   | Renal_patient? |    | Percentage Correct |
|          |                    |   | 0              | 1  |                    |
| Step 1   | Renal_patient?     | 0 | 220            | 22 | 90.9               |
|          |                    | 1 | 62             | 42 | 40.4               |
|          | Overall Percentage |   |                |    | 75.7               |

a. The cut value is .500

**Variables in the Equation**

|                     | B              | S.E.   | Wald   | df     | Sig. | Exp(B) |
|---------------------|----------------|--------|--------|--------|------|--------|
| Step 1 <sup>a</sup> | Q2_Age         | .067   | 37.683 | 1      | .000 | 1.069  |
|                     | Q3_Gender(1)   | .963   | 12.406 | 1      | .000 | 2.619  |
|                     | Farming(1)     | 1.127  | 5.534  | 1      | .019 | 3.086  |
|                     | RatsInHouse(1) | -.235  | .468   | 1      | .494 | .790   |
|                     | Constant       | -5.635 | .774   | 53.030 | .000 | .004   |

**Variables in the Equation**

|                     |                | 95% C.I. for EXP(B) |       |
|---------------------|----------------|---------------------|-------|
|                     |                | Lower               | Upper |
| Step 1 <sup>a</sup> | Q2_Age         | 1.047               | 1.092 |
|                     | Q3_Gender(1)   | 1.533               | 4.476 |
|                     | Farming(1)     | 1.207               | 7.892 |
|                     | RatsInHouse(1) | .402                | 1.552 |
|                     | Constant       |                     |       |

a. Variable(s) entered on step 1: RatsInHouse.

## Block 5: Method = Enter

**Omnibus Tests of Model Coefficients**

|        | Chi-square | df | Sig. |
|--------|------------|----|------|
| Step 1 | 8.960      | 1  | .003 |
| Block  | 8.960      | 1  | .003 |
| Model  | 92.735     | 5  | .000 |



### Model Summary

| Step | -2 Log likelihood    | Cox & Snell R Square | Nagelkerke R Square |
|------|----------------------|----------------------|---------------------|
| 1    | 330.322 <sup>a</sup> | .235                 | .333                |

a. Estimation terminated at iteration number 6 because parameter estimates changed by less than .001.

### Hosmer and Lemeshow Test

| Step | Chi-square | df | Sig. |
|------|------------|----|------|
| 1    | 6.813      | 8  | .557 |

### Contingency Table for Hosmer and Lemeshow Test

|        |    | Renal_patient? = 0 |          | Renal_patient? = 1 |          | Total |
|--------|----|--------------------|----------|--------------------|----------|-------|
|        |    | Observed           | Expected | Observed           | Expected |       |
| Step 1 | 1  | 33                 | 34.358   | 2                  | .642     | 35    |
|        | 2  | 34                 | 33.005   | 1                  | 1.995    | 35    |
|        | 3  | 34                 | 31.615   | 1                  | 3.385    | 35    |
|        | 4  | 30                 | 29.418   | 5                  | 5.582    | 35    |
|        | 5  | 25                 | 25.363   | 8                  | 7.637    | 33    |
|        | 6  | 24                 | 24.504   | 11                 | 10.496   | 35    |
|        | 7  | 23                 | 23.491   | 15                 | 14.509   | 38    |
|        | 8  | 17                 | 18.391   | 17                 | 15.609   | 34    |
|        | 9  | 12                 | 13.883   | 22                 | 20.117   | 34    |
|        | 10 | 10                 | 7.973    | 22                 | 24.027   | 32    |

### Classification Table<sup>a</sup>

| Observed           |                  | Predicted      |    |                    |
|--------------------|------------------|----------------|----|--------------------|
|                    |                  | Renal_patient? |    | Percentage Correct |
|                    |                  | 0              | 1  |                    |
| Step 1             | Renal_patient? 0 | 218            | 24 | 90.1               |
|                    | 1                | 58             | 46 | 44.2               |
| Overall Percentage |                  |                |    | 76.3               |

a. The cut value is .500

**Variables in the Equation**

|                            | B      | S.E. | Wald   | df | Sig. | Exp(B) |
|----------------------------|--------|------|--------|----|------|--------|
| Step 1 <sup>a</sup> Q2_Age | .071   | .011 | 40.283 | 1  | .000 | 1.074  |
| Q3_Gender(1)               | 1.007  | .278 | 13.075 | 1  | .000 | 2.737  |
| Farming(1)                 | 1.012  | .486 | 4.340  | 1  | .037 | 2.751  |
| RatsInHouse(1)             | -1.058 | .462 | 5.249  | 1  | .022 | .347   |
| DriedRodentFaeces2(1)      | 1.106  | .389 | 8.102  | 1  | .004 | 3.023  |
| Constant                   | -5.867 | .798 | 54.038 | 1  | .000 | .003   |

**Variables in the Equation**

|                            | 95% C.I. for EXP(B) |       |
|----------------------------|---------------------|-------|
|                            | Lower               | Upper |
| Step 1 <sup>a</sup> Q2_Age | 1.051               | 1.098 |
| Q3_Gender(1)               | 1.586               | 4.723 |
| Farming(1)                 | 1.062               | 7.127 |
| RatsInHouse(1)             | .140                | .858  |
| DriedRodentFaeces2(1)      | 1.411               | 6.475 |
| Constant                   |                     |       |

a. Variable(s) entered on step 1: DriedRodentFaeces2.

## Block 6: Method = Enter

**Omnibus Tests of Model Coefficients**

|             | Chi-square | df | Sig. |
|-------------|------------|----|------|
| Step 1 Step | 15.846     | 1  | .000 |
| Block       | 15.846     | 1  | .000 |
| Model       | 108.581    | 6  | .000 |

**Model Summary**

| Step | -2 Log likelihood    | Cox & Snell R Square | Nagelkerke R Square |
|------|----------------------|----------------------|---------------------|
| 1    | 314.476 <sup>a</sup> | .269                 | .382                |

a. Estimation terminated at iteration number 6 because parameter estimates changed by less than .001.

**Hosmer and Lemeshow Test**

| Step | Chi-square | df | Sig. |
|------|------------|----|------|
| 1    | 12.536     | 8  | .129 |

**Contingency Table for Hosmer and Lemeshow Test**

|        |    | Renal_patient? = 0 |          | Renal_patient? = 1 |          | Total |
|--------|----|--------------------|----------|--------------------|----------|-------|
|        |    | Observed           | Expected | Observed           | Expected |       |
| Step 1 | 1  | 33                 | 34.466   | 2                  | .534     | 35    |
|        | 2  | 34                 | 33.424   | 1                  | 1.576    | 35    |
|        | 3  | 34                 | 32.041   | 1                  | 2.959    | 35    |
|        | 4  | 29                 | 29.807   | 6                  | 5.193    | 35    |
|        | 5  | 32                 | 27.529   | 3                  | 7.471    | 35    |
|        | 6  | 24                 | 24.989   | 11                 | 10.011   | 35    |
|        | 7  | 21                 | 23.012   | 15                 | 12.988   | 36    |
|        | 8  | 15                 | 18.327   | 20                 | 16.673   | 35    |
|        | 9  | 12                 | 12.819   | 23                 | 22.181   | 35    |
|        | 10 | 8                  | 5.585    | 22                 | 24.415   | 30    |

**Classification Table<sup>a</sup>**

| Observed |                    |   | Predicted      |    |                       |
|----------|--------------------|---|----------------|----|-----------------------|
|          |                    |   | Renal_patient? |    | Percentage<br>Correct |
|          |                    |   | 0              | 1  |                       |
| Step 1   | Renal_patient?     | 0 | 219            | 23 | 90.5                  |
|          |                    | 1 | 49             | 55 | 52.9                  |
|          | Overall Percentage |   |                |    | 79.2                  |

a. The cut value is .500

**Variables in the Equation**

|                       | B      | S.E. | Wald   | df | Sig. | Exp(B) |
|-----------------------|--------|------|--------|----|------|--------|
| Step 1 <sup>a</sup>   |        |      |        |    |      |        |
| Q2_Age                | .069   | .012 | 34.810 | 1  | .000 | 1.071  |
| Q3_Gender(1)          | .756   | .291 | 6.753  | 1  | .009 | 2.131  |
| Farming(1)            | .917   | .490 | 3.502  | 1  | .061 | 2.503  |
| RatsInHouse(1)        | -1.209 | .474 | 6.509  | 1  | .011 | .299   |
| DriedRodentFaeces2(1) | 1.250  | .403 | 9.634  | 1  | .002 | 3.491  |
| Hanta_positive        | 1.189  | .301 | 15.634 | 1  | .000 | 3.284  |
| Constant              | -5.863 | .818 | 51.438 | 1  | .000 | .003   |

# Variables in the Equation

|                     |                       | 95% C.I. for EXP(B) |       |
|---------------------|-----------------------|---------------------|-------|
|                     |                       | Lower               | Upper |
| Step 1 <sup>a</sup> | Q2_Age                | 1.047               | 1.096 |
|                     | Q3_Gender(1)          | 1.204               | 3.769 |
|                     | Farming(1)            | .957                | 6.543 |
|                     | RatsInHouse(1)        | .118                | .756  |
|                     | DriedRodentFaeces2(1) | 1.585               | 7.689 |
|                     | Hanta_positive        | 1.822               | 5.922 |
|                     | Constant              |                     |       |

a. Variable(s) entered on step 1: Hanta\_positive.
